# Supplementary material for: Inferring fitness landscapes and selection on phenotypic states from single-cell genealogical data
Source: PubMed Central journal article supplement (PMC5360348; doi:10.1371/journal.pgen.1006653), 2017-03-07
Supplement: pgen.1006653.s002.pdf [file pgen.1006653.s002.pdf]

| Data    | 0 min | 200 min | 400 min |
|---------|-------|---------|---------|
| - Sm #1 | 235   | 1042    | 4752    |
| - Sm #2 | 148   | 721     | 3298    |
| - Sm #3 | 89    | 394     | 1622    |
| + Sm #1 | 190   | 804     | 2828    |
| + Sm #2 | 172   | 793     | 2995    |
| + Sm #3 | 137   | 593     | 2239    |
