# Supplementary material for: Inferring fitness landscapes and selection on phenotypic states from single-cell genealogical data
Source: PubMed Central journal article supplement (PMC5360348; doi:10.1371/journal.pgen.1006653), 2017-03-07
Supplement: pgen.1006653.s003.pdf [file pgen.1006653.s003.pdf]

| Data    | 0 min | 100 min | 300 min |
|---------|-------|---------|---------|
| - Sm #1 | 70    | 171     | 952     |
| - Sm #2 | 77    | 192     | 1082    |
| - Sm #3 | 54    | 121     | 644     |
| - Sm #4 | 110   | 260     | 1694    |
| + Sm #1 | 147   | 298     | 1486    |
| + Sm #2 | 55    | 137     | 645     |
| + Sm #3 | 42    | 92      | 477     |
| + Sm #4 | 58    | 125     | 652     |
