# Supplementary material for: Inferring fitness landscapes and selection on phenotypic states from single-cell genealogical data
Source: PubMed Central journal article supplement (PMC5360348; doi:10.1371/journal.pgen.1006653), 2017-03-07
Supplement: pgen.1006653.s004.pdf [file pgen.1006653.s004.pdf]

| Name           | Sequence (5' to 3')                       |
|----------------|-------------------------------------------|
| SacI-str_F     | AAAGAGCTCCGCTCACGCAACTGGGTCCAGAAC         |
| str-Mlu_R      | CCAACGCGTTTTTGCCGACTACCTTGGGTGATC         |
| RBS-A-venus_F  | GGAAAAAATGGTGAGCAAGGGGCGAGGAG             |
| PLseries_R     | TCCTCTTTAATGTTTTTCGGTTCAGTGC              |
| RBS4ATG_F      | AGGAGGAAAAAATGCGCTCACGCAACTGGGTCCAGAA     |
| TAAA_R         | TTACTTGTACAGCTCGTCCATGCCG                 |
| term_F         | CAGGCATCAAATAAAAACGAAAGGC                 |
| venus_R        | TTACTTGTACAGCTCGTCCAT                     |
| intC_PlacO1_F3 | AGTTGTTAAGGTTCGCTCACTCCACCTTCTCATCAAGCC   |
|                | AGTCCGCCCAAATTGTGAGCGGATAACAATTG          |
| intC_R         | CCGTAGATTTACAGTTCGTTCATGGTTTCGCTTTCAGATCG |
|                | TTGACAGCCGCAATTCCGGGGGATCCGTTCGACC        |
| galK_PtetO1_F3 | TTCATATTGTTTCAGCGACAGCTTGCTGTACGGCAGGCA   |
|                | CCAGCTCTTCCGAATTGTGAGCGGATAACAAT          |
| galK_R3        | GTTTGCGCGCAGTCAGCGATATCCATTTTCGCGAATCC    |
|                | GGAGTGTAAGAAATTCCGGGGGATCCGTTCGACC        |
