# Supplementary material for: Inferring fitness landscapes and selection on phenotypic states from single-cell genealogical data
Source: PubMed Central journal article supplement (PMC5360348; doi:10.1371/journal.pgen.1006653), 2017-03-07

**A**

|            | - SM  |       |       |                  | + SM  |       |       |                  |
|------------|-------|-------|-------|------------------|-------|-------|-------|------------------|
| Time (min) | #1    | #2    | #3    | Ave. $\pm$ SD    | #1    | #2    | #3    | Ave. $\pm$ SD    |
| 200        | 0.06  | 0.01  | 0.13  | 0.06 $\pm$ 0.05  | 0.06  | 0.15  | 0.06  | 0.09 $\pm$ 0.04  |
| 300        | 0.00  | -0.05 | 0.05  | 0.00 $\pm$ 0.04  | -0.03 | -0.05 | -0.08 | -0.05 $\pm$ 0.02 |
| 400        | -0.07 | -0.11 | -0.03 | -0.07 $\pm$ 0.03 | -0.15 | -0.11 | -0.18 | -0.14 $\pm$ 0.03 |

**B**

-SM #2, t = 300 min, N = 1567

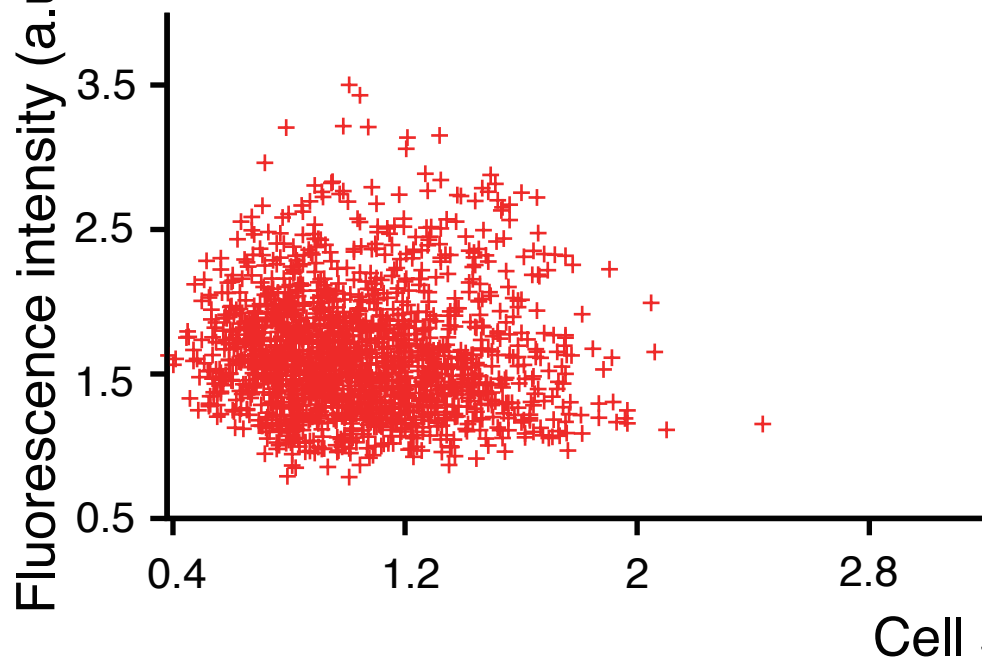**C**

+SM #2, t = 300 min, N = 1610

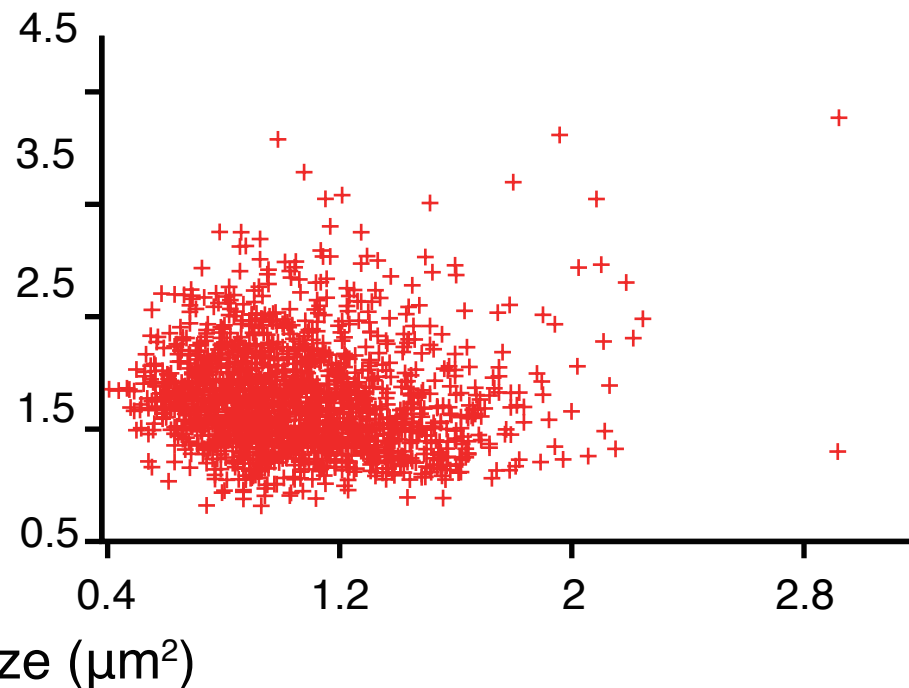

Supplement: pgen.1006653.s008.pdf [file pgen.1006653.s008.pdf]
