# Supplementary material for: Inferring fitness landscapes and selection on phenotypic states from single-cell genealogical data
Source: PubMed Central journal article supplement (PMC5360348; doi:10.1371/journal.pgen.1006653), 2017-03-07
Supplement: pgen.1006653.s009.pdf [file pgen.1006653.s009.pdf]

**A**

|            | - SM  |       |       |       |                  | + SM  |       |       |       |                  |
|------------|-------|-------|-------|-------|------------------|-------|-------|-------|-------|------------------|
| Time (min) | #1    | #2    | #3    | #4    | Ave. $\pm$ SD    | #1    | #2    | #3    | #4    | Ave. $\pm$ SD    |
| 100        | 0.03  | -0.17 | -0.24 | -0.07 | -0.11 $\pm$ 0.10 | 0.20  | 0.20  | 0.24  | 0.00  | 0.16 $\pm$ 0.09  |
| 200        | -0.17 | -0.25 | -0.09 | -0.24 | -0.19 $\pm$ 0.07 | -0.20 | -0.12 | -0.26 | -0.10 | -0.17 $\pm$ 0.06 |
| 300        | -0.32 | -0.30 | -0.33 | -0.26 | -0.30 $\pm$ 0.03 | -0.24 | -0.22 | -0.22 | -0.30 | -0.24 $\pm$ 0.04 |

**B**

Fluorescence intensity (a.u.)

-SM #4, t = 200 min, N = 645

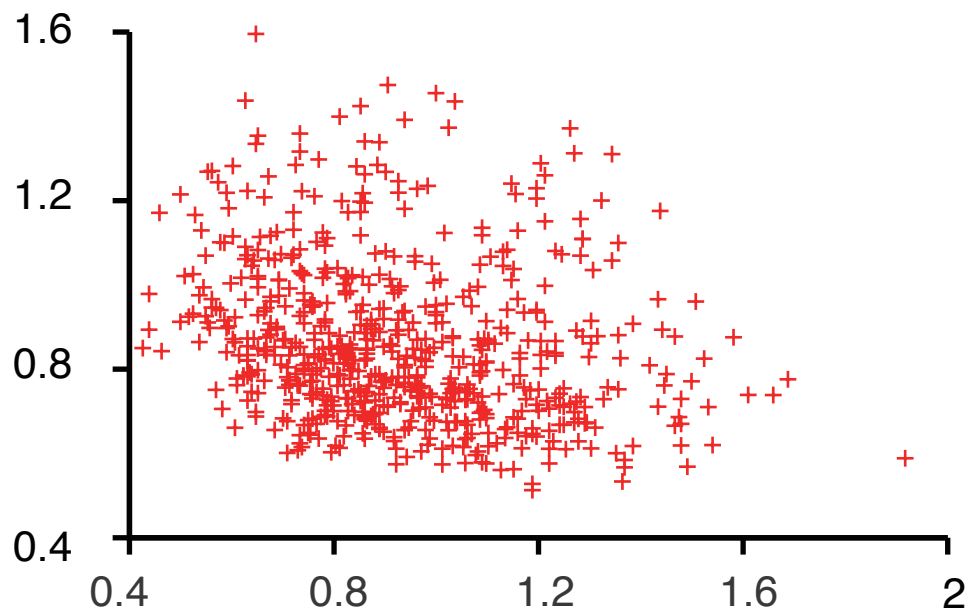**C**

+SM #1, t = 200 min, N = 667

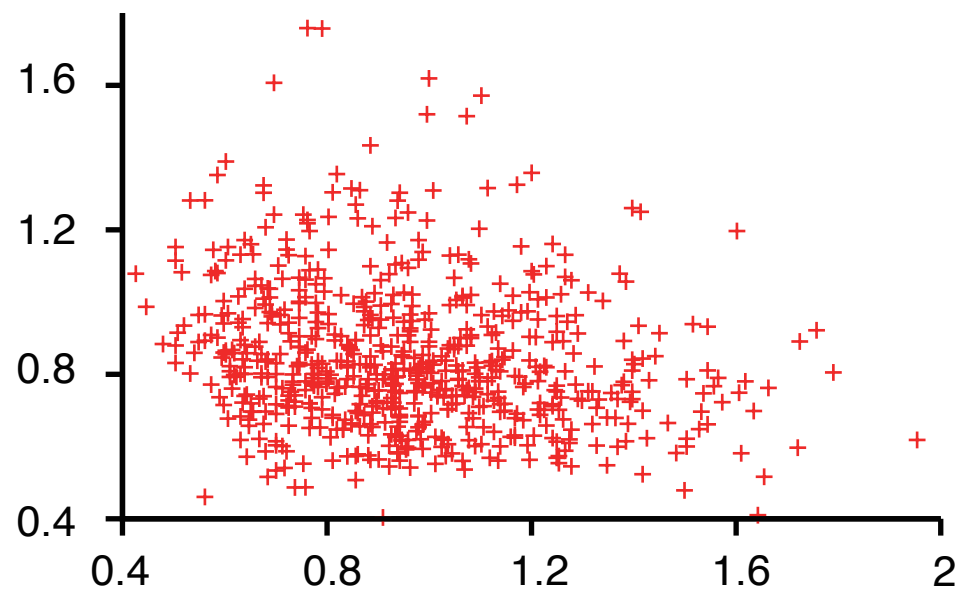Cell size ( $\mu\text{m}^2$ )
