# Supplementary material for: Inferring fitness landscapes and selection on phenotypic states from single-cell genealogical data
Source: PubMed Central journal article supplement (PMC5360348; doi:10.1371/journal.pgen.1006653), 2017-03-07
Supplement: pgen.1006653.s012.pdf [file pgen.1006653.s012.pdf]

# F3NW (100 - 300 min)

– Sm

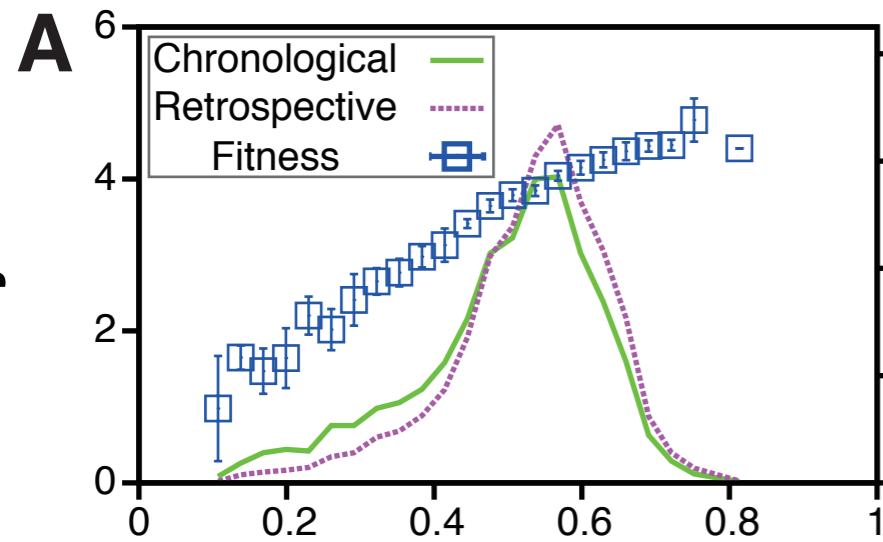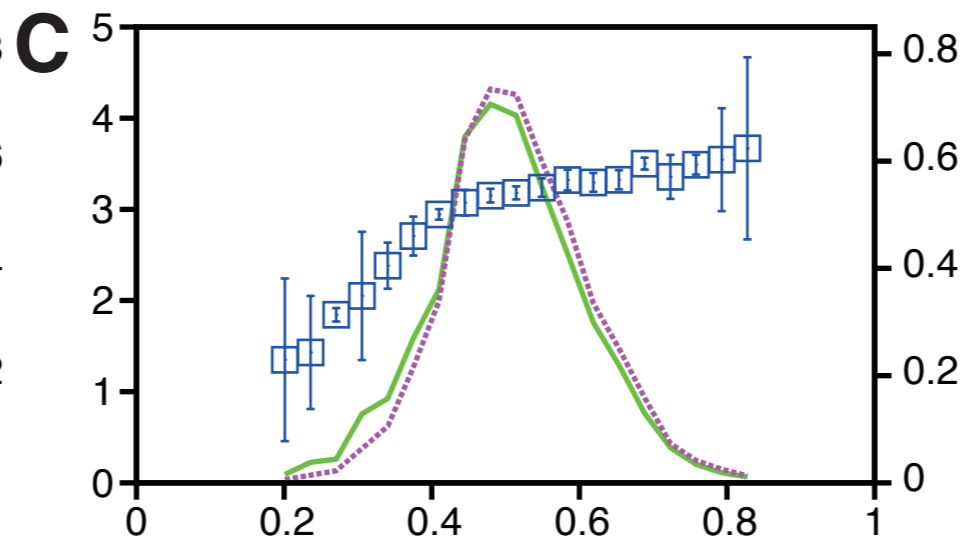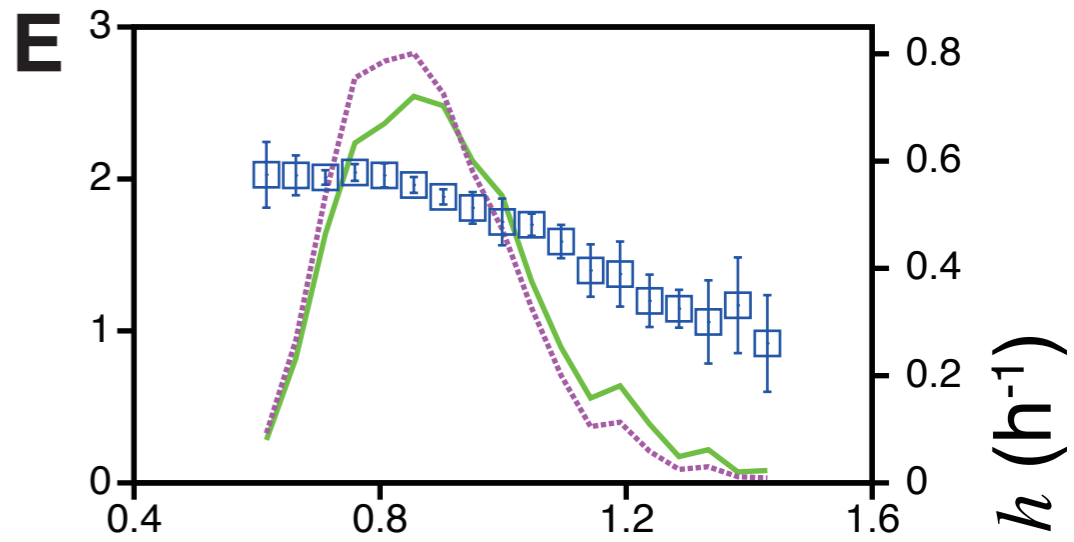

+ Sm

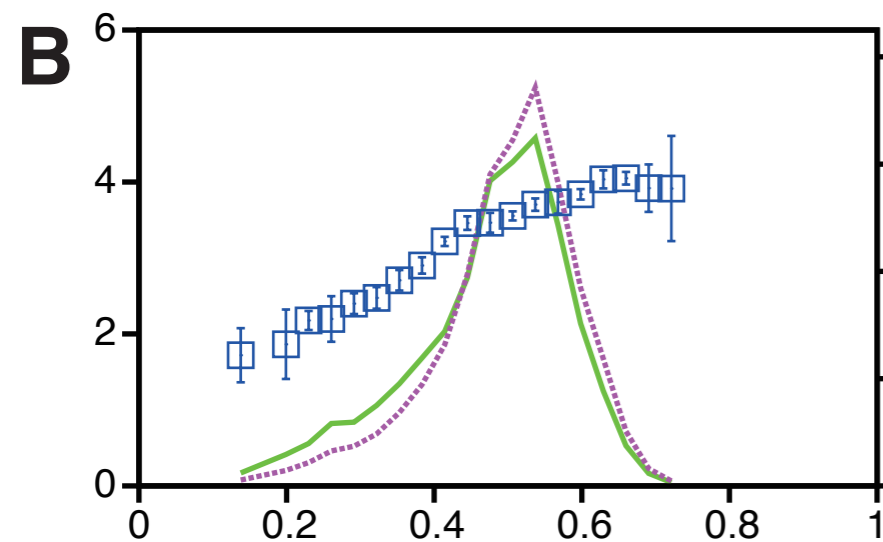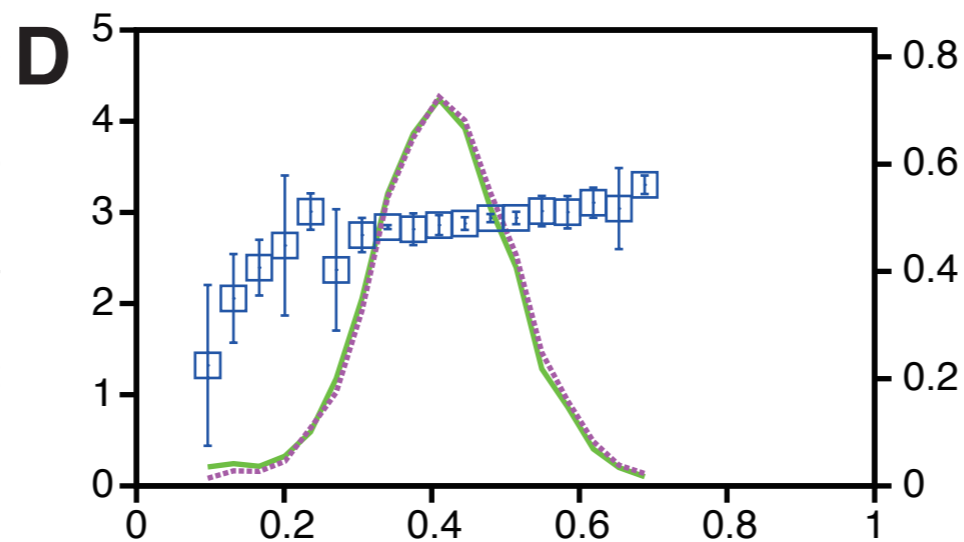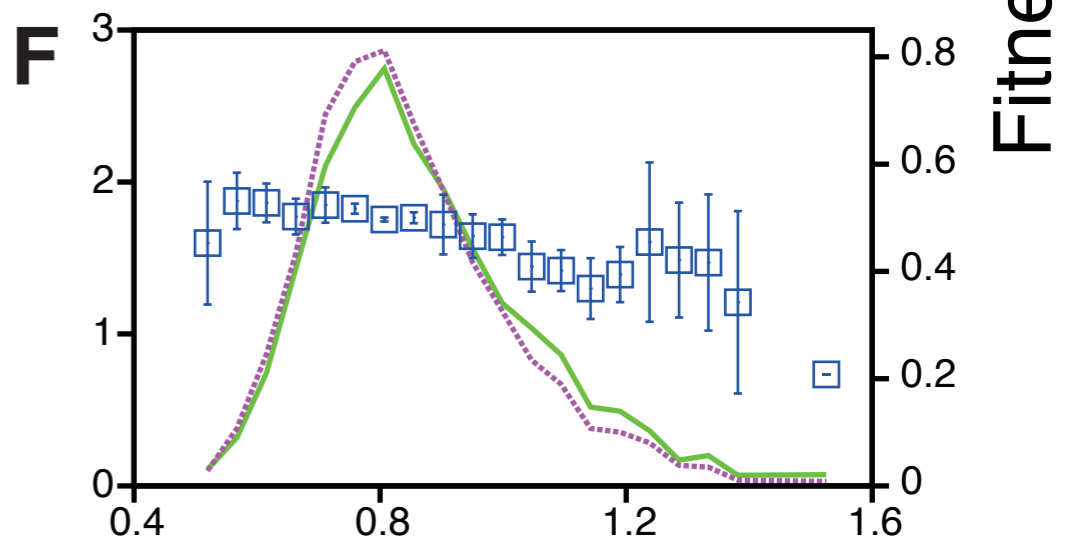

Time-averaged elongation rate ( $\text{h}^{-1}$ )  $\bar{\lambda}_\tau$

Time-averaged protein production rate (a.u.)  $\bar{p}_\tau$

Time-averaged protein concentration (a.u.)  $\bar{c}_\tau$

Fitness  $h$  ( $\text{h}^{-1}$ )
