# Supplementary material for: Inferring fitness landscapes and selection on phenotypic states from single-cell genealogical data
Source: PubMed Central journal article supplement (PMC5360348; doi:10.1371/journal.pgen.1006653), 2017-03-07

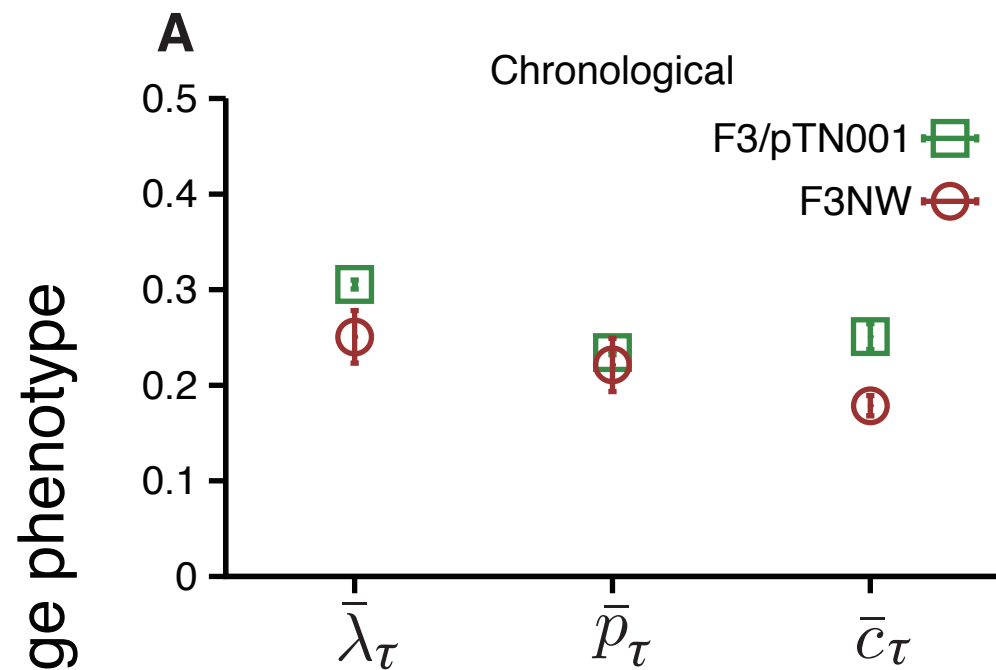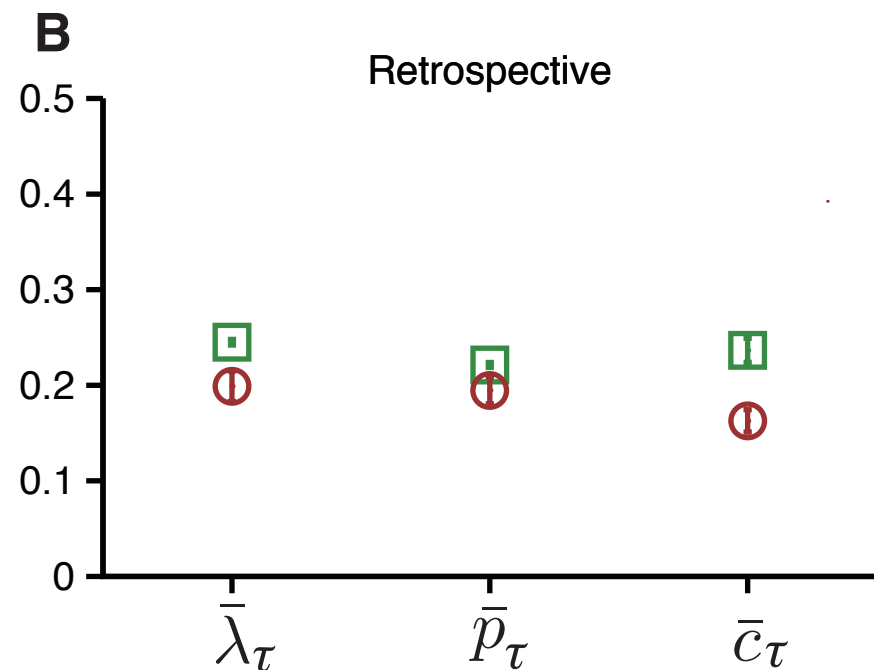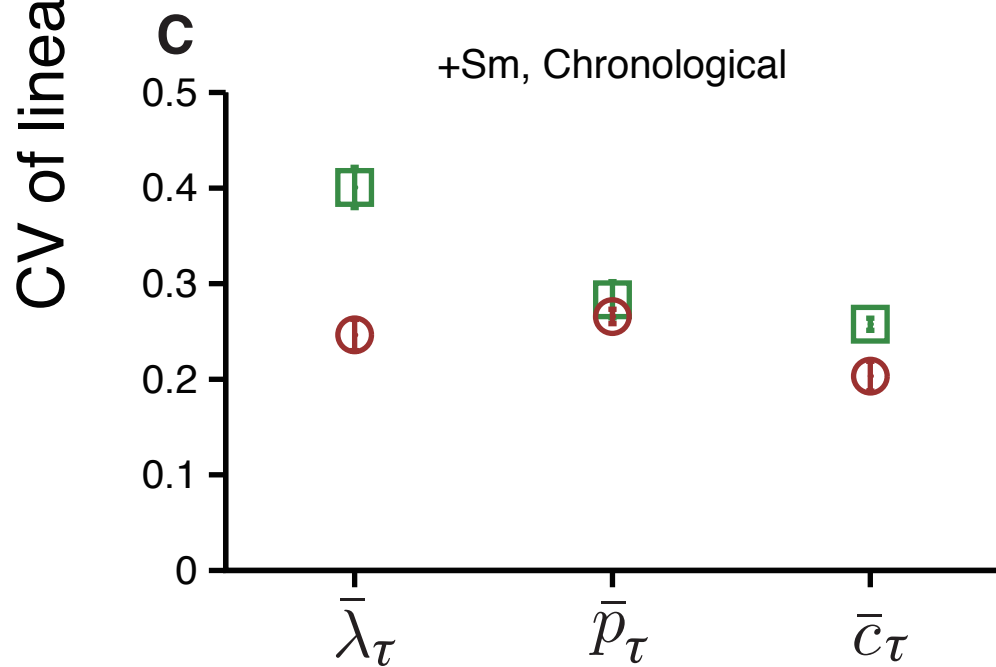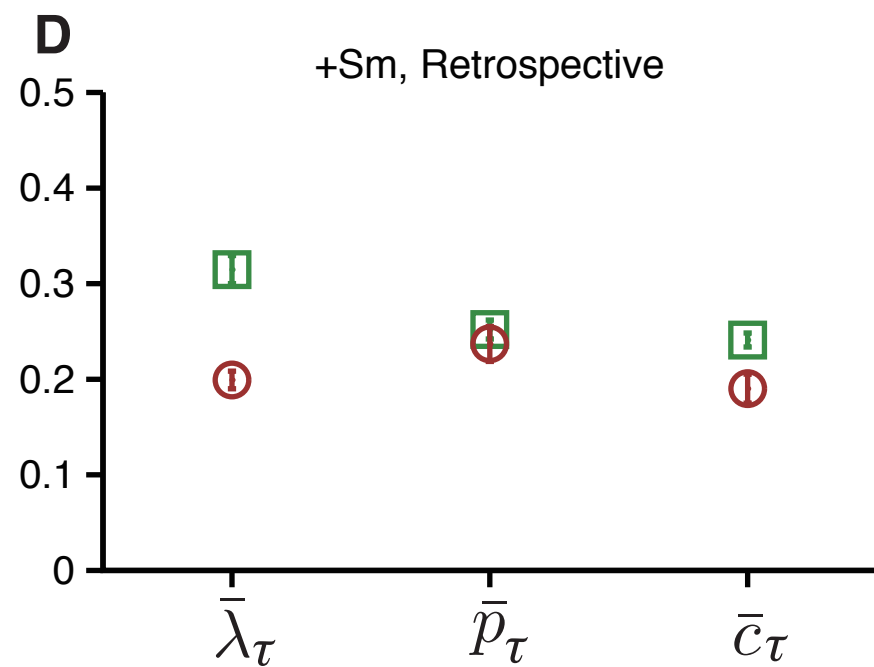

Supplement: pgen.1006653.s013.pdf [file pgen.1006653.s013.pdf]
