# Supplementary material for: Inferring fitness landscapes and selection on phenotypic states from single-cell genealogical data
Source: PubMed Central journal article supplement (PMC5360348; doi:10.1371/journal.pgen.1006653), 2017-03-07
Supplement: pgen.1006653.s015.pdf [file pgen.1006653.s015.pdf]

FL concentration  $+$

Elongation rate  $\times$

FL production rate  $\times$

Division count  $—$

Selection strength ( $h^{-1}$ )

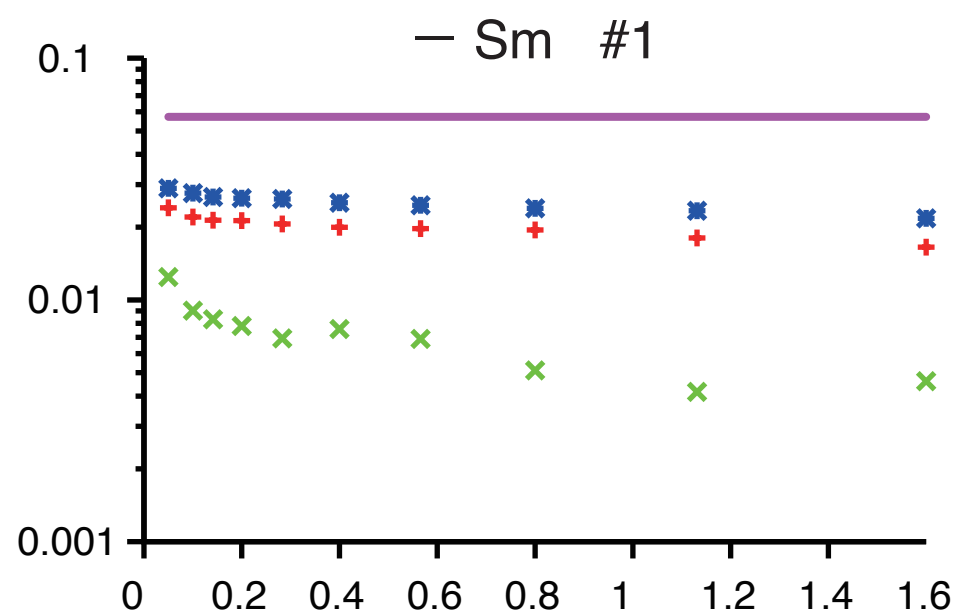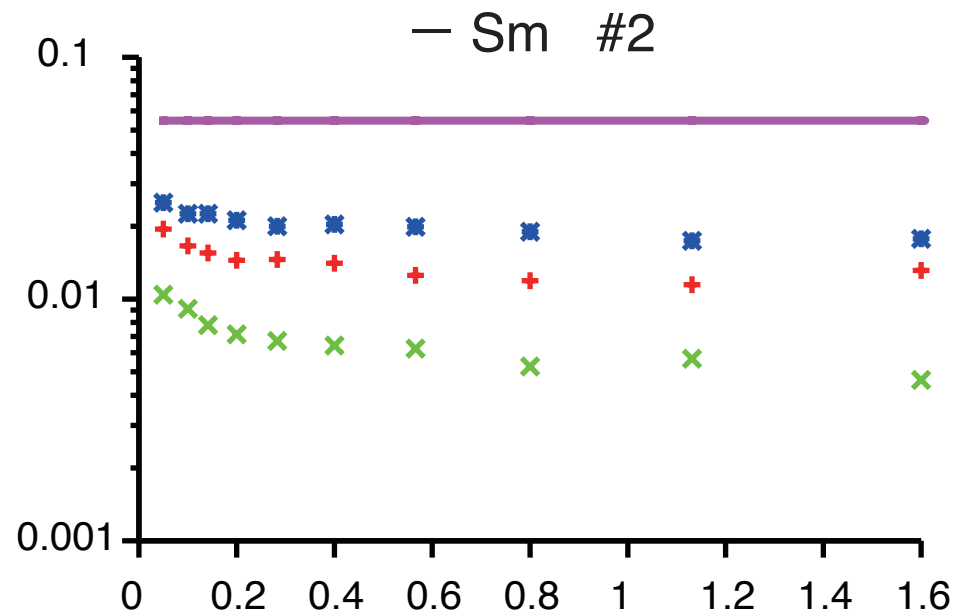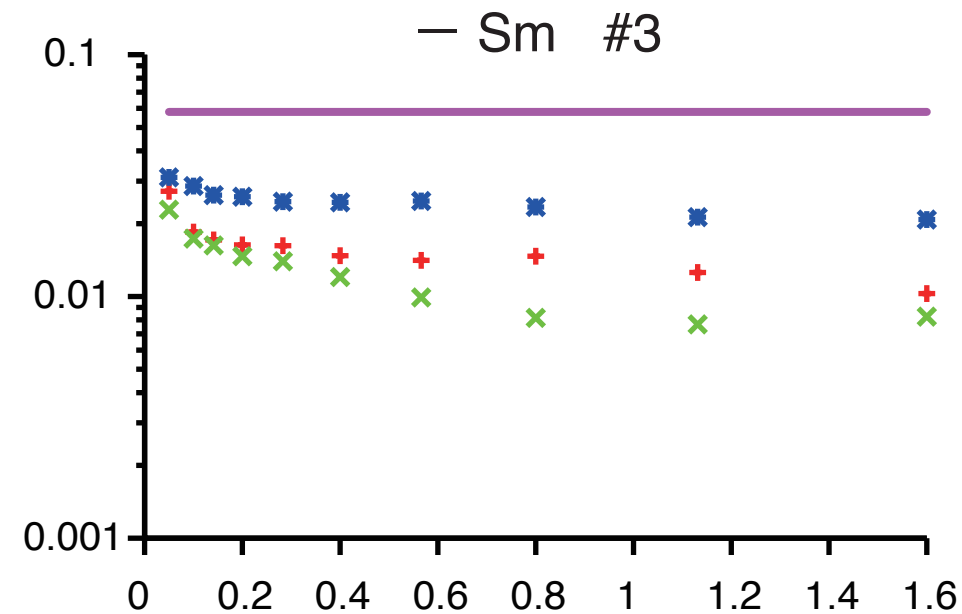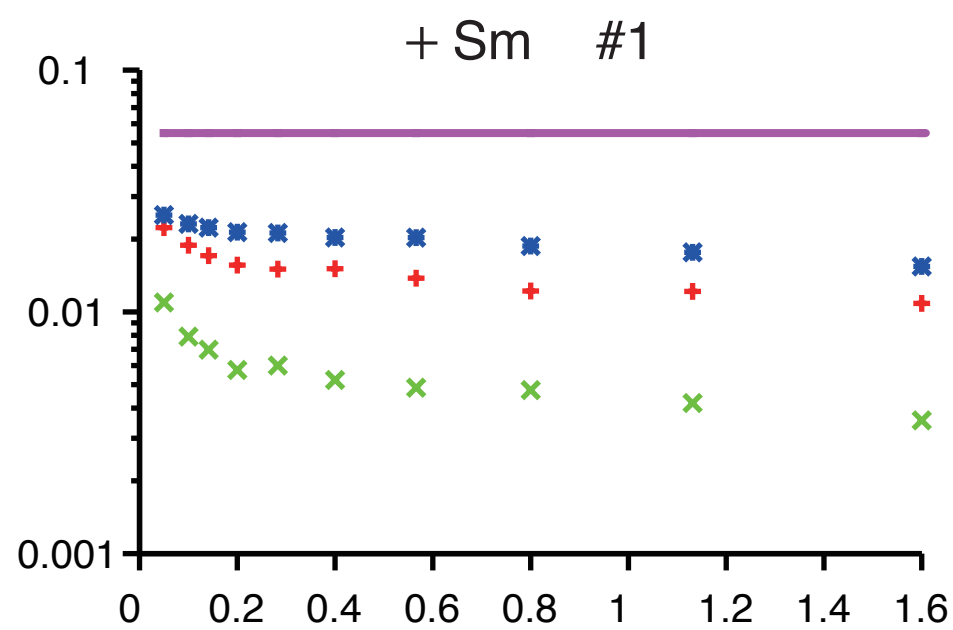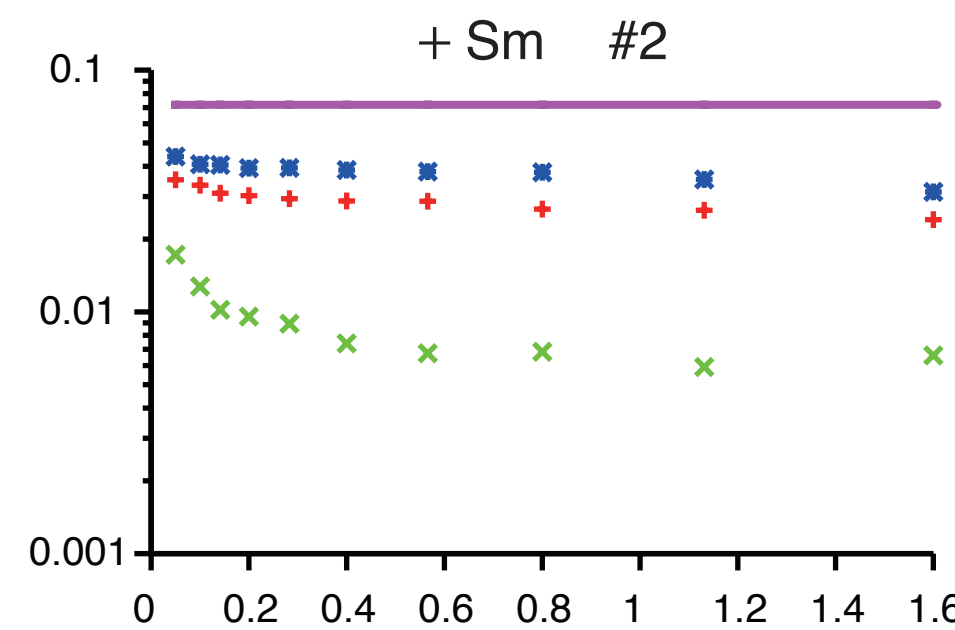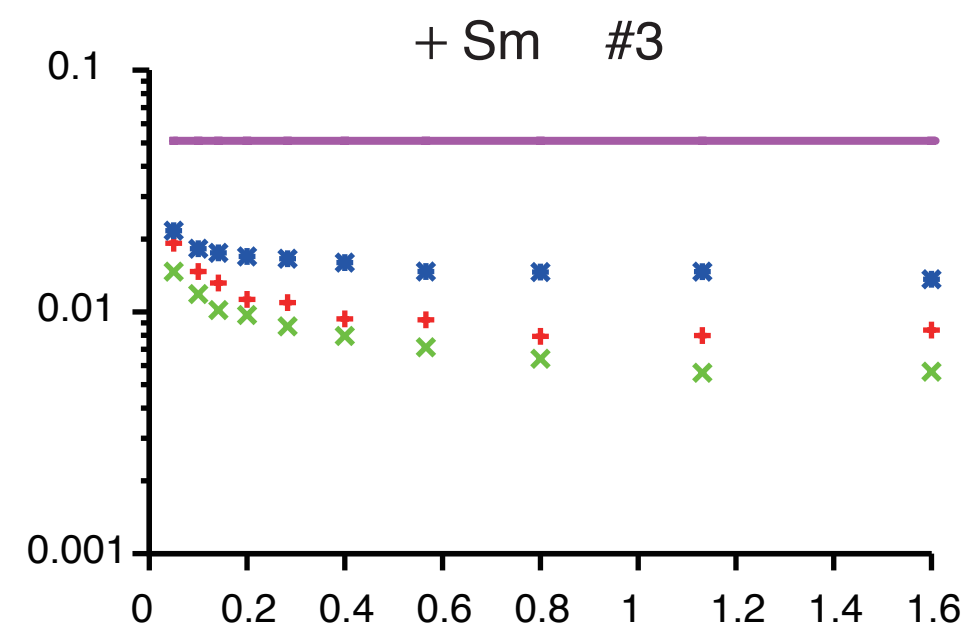

$\alpha = \text{Bin width} / \text{IQR}$
