# Supplementary material for: Inferring fitness landscapes and selection on phenotypic states from single-cell genealogical data
Source: PubMed Central journal article supplement (PMC5360348; doi:10.1371/journal.pgen.1006653), 2017-03-07
Supplement: pgen.1006653.s017.pdf [file pgen.1006653.s017.pdf]

FL concentration  $+$

Elongation rate  $\times$

FL production rate  $\times$

Division count  $—$

Selection strength ( $h^{-1}$ )

— Sm #1

— Sm #2

— Sm #3

— Sm #4

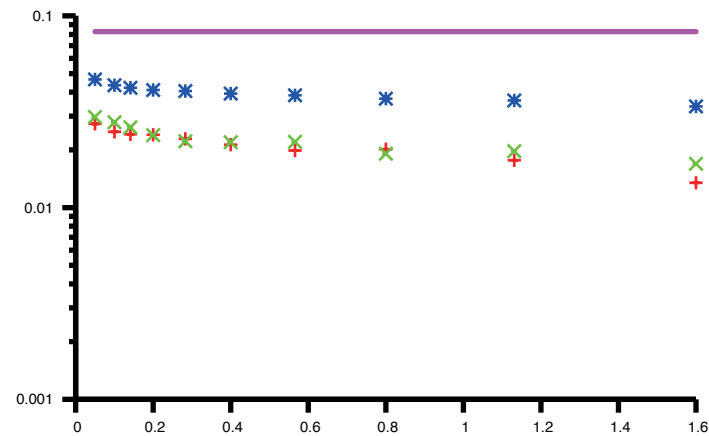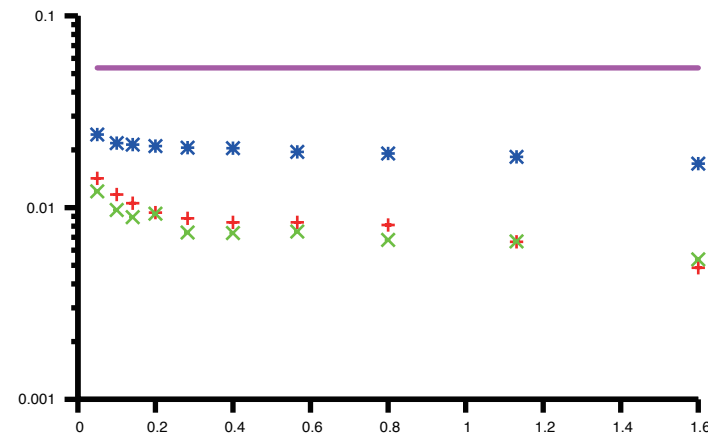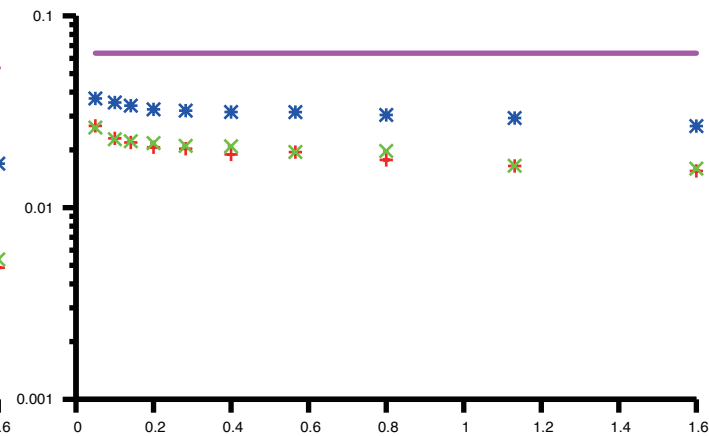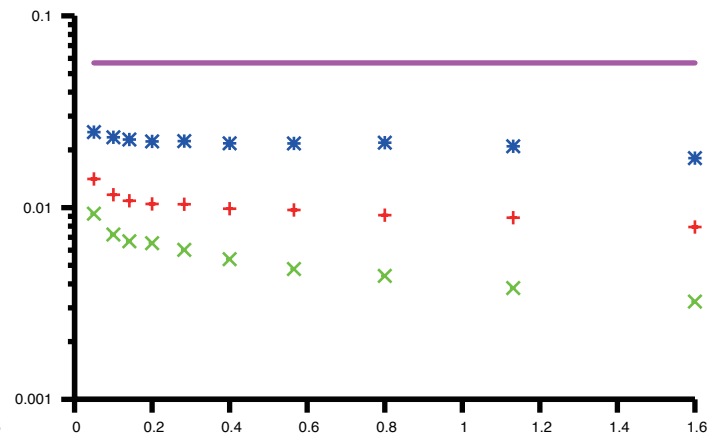

+ Sm #1

+ Sm #2

+ Sm #3

+ Sm #4

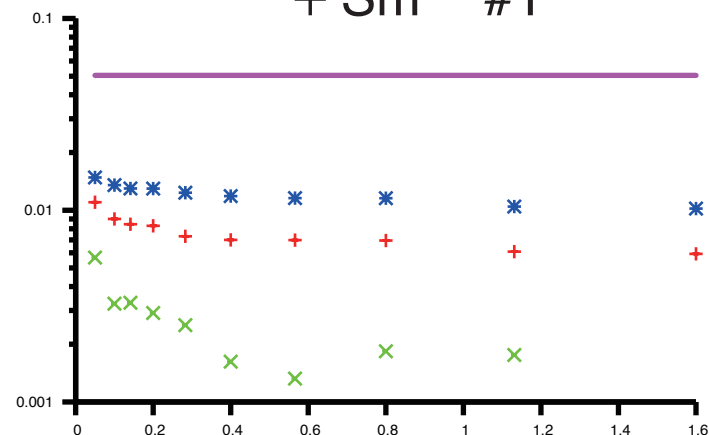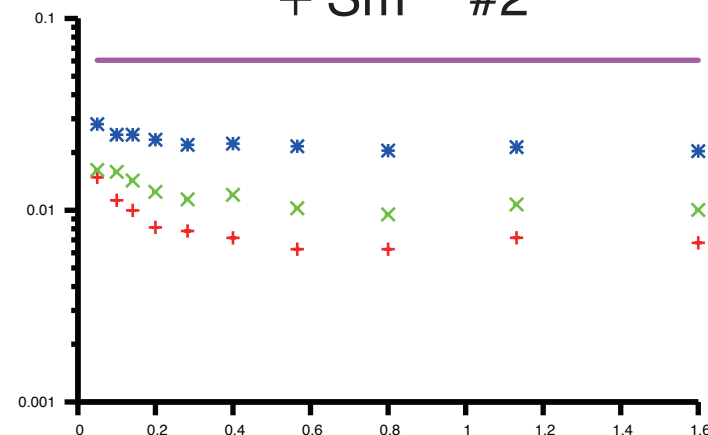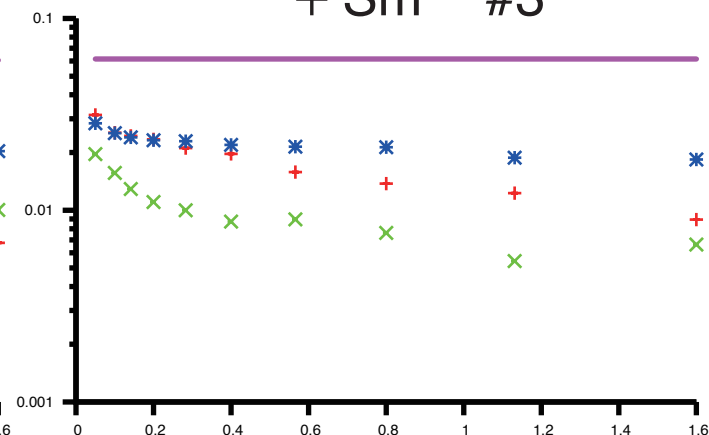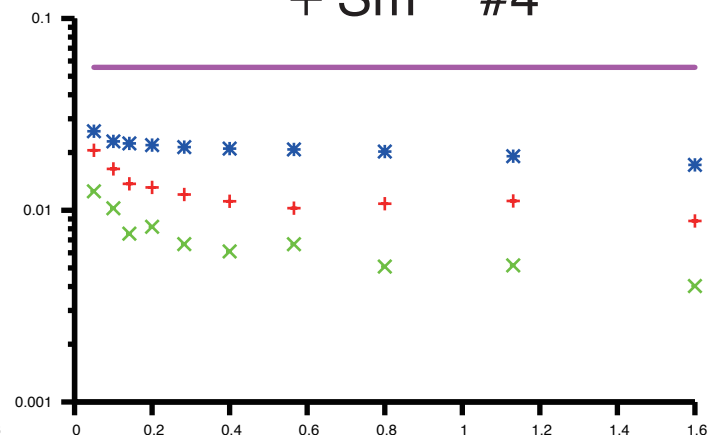

$\alpha = \text{Bin width} / \text{IQR}$
